# Supplementary material
Source: PubMed Central journal article supplement (PMC548988)

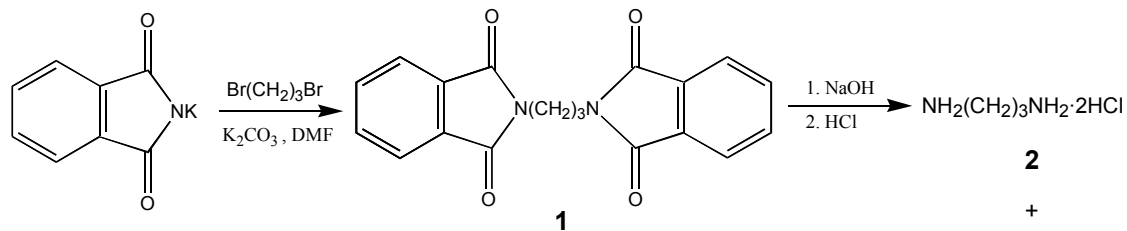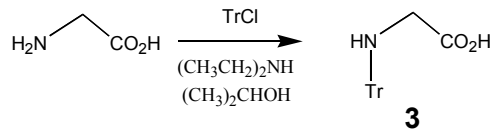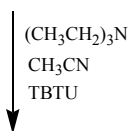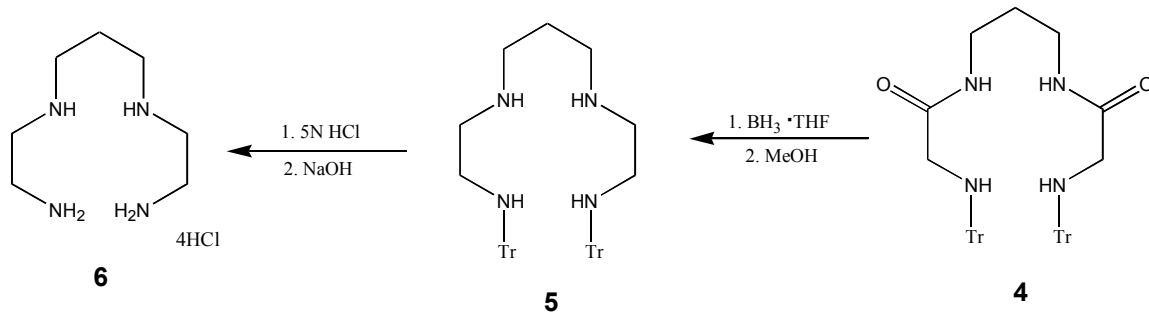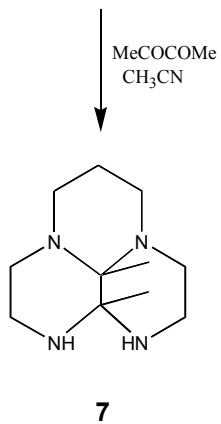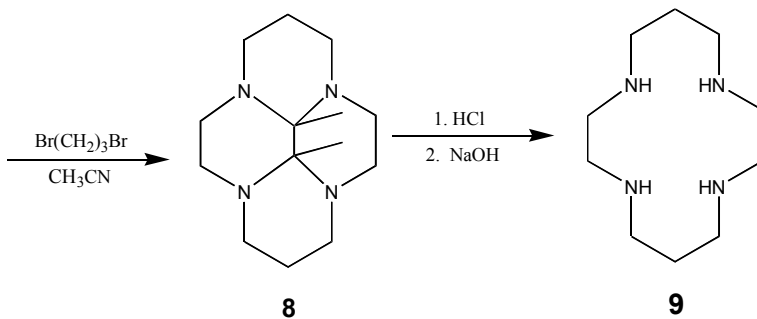

Supplement: pnas_102_7_2288__1.pdf [file pnas_102_7_2288__1.pdf]

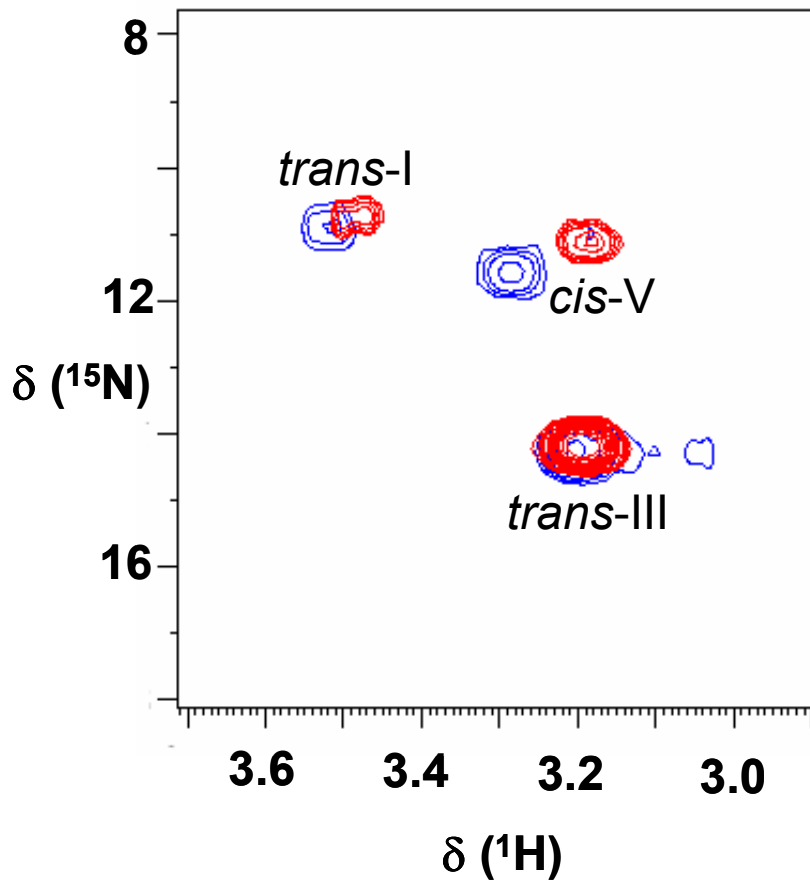

Supplement: pnas_102_7_2288__2.pdf [file pnas_102_7_2288__2.pdf]

(B)

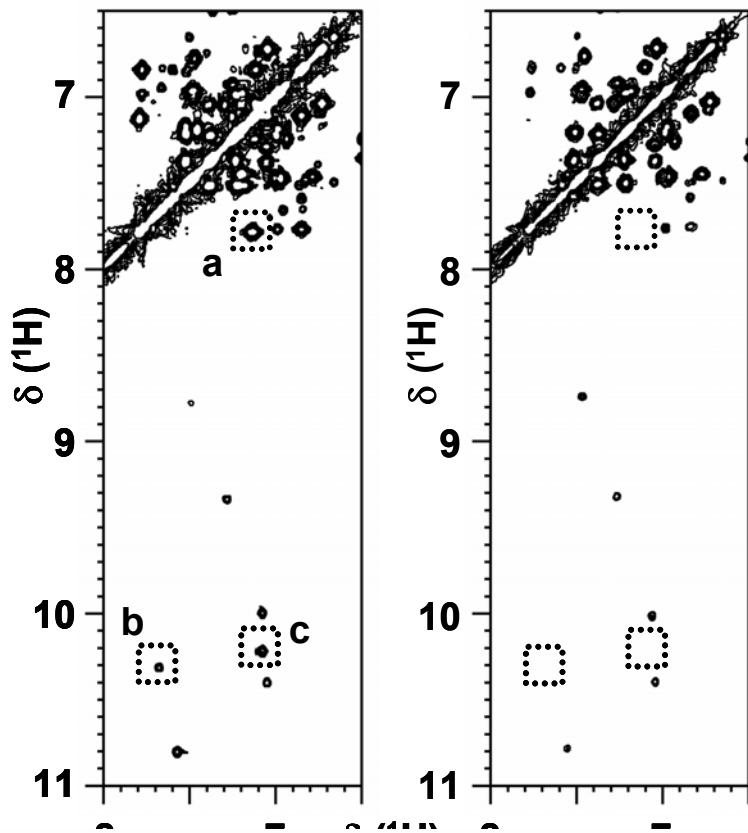

(A)

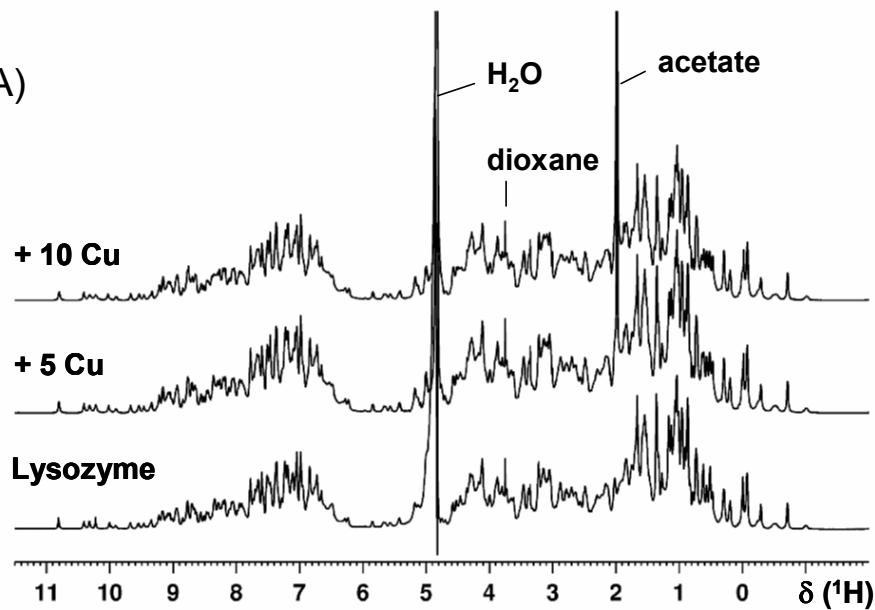

Supplement: pnas_102_7_2288__4.pdf [file pnas_102_7_2288__4.pdf]

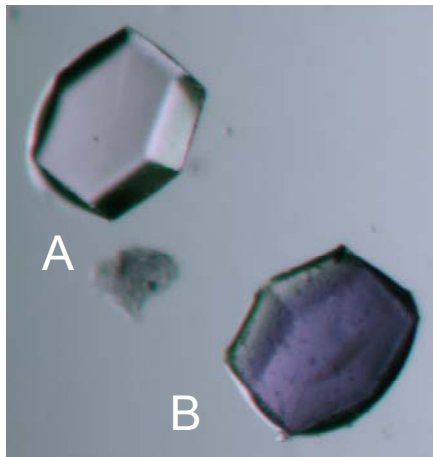

Supplement: pnas_102_7_2288__5.pdf [file pnas_102_7_2288__5.pdf]

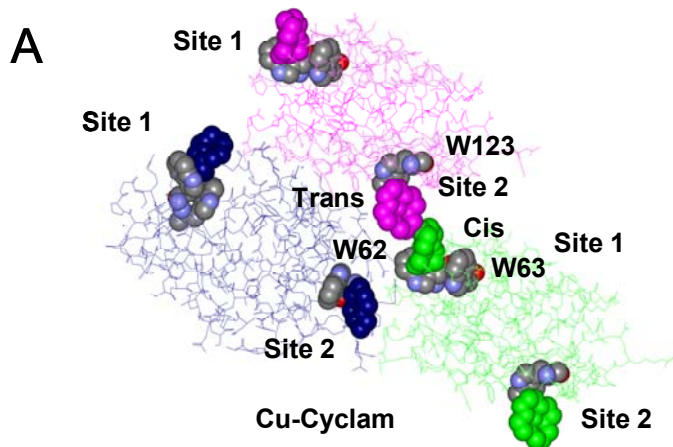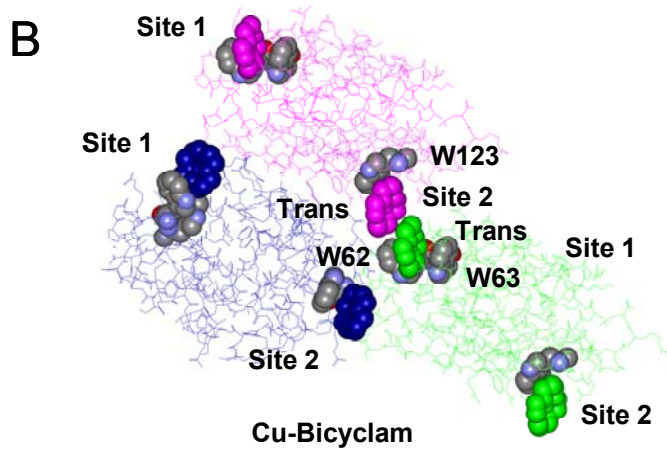

Supplement: pnas_102_7_2288__6.pdf [file pnas_102_7_2288__6.pdf]

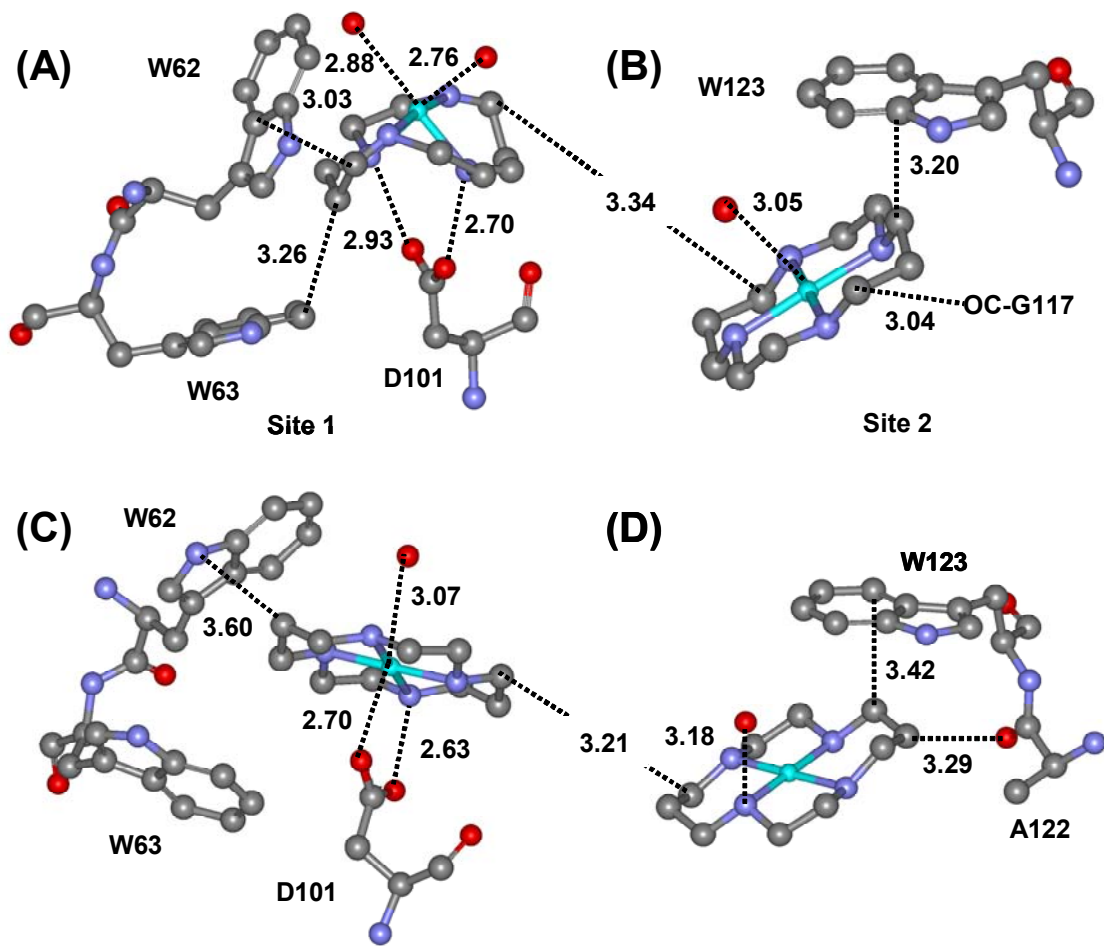

Supplement: pnas_102_7_2288__7.pdf [file pnas_102_7_2288__7.pdf]

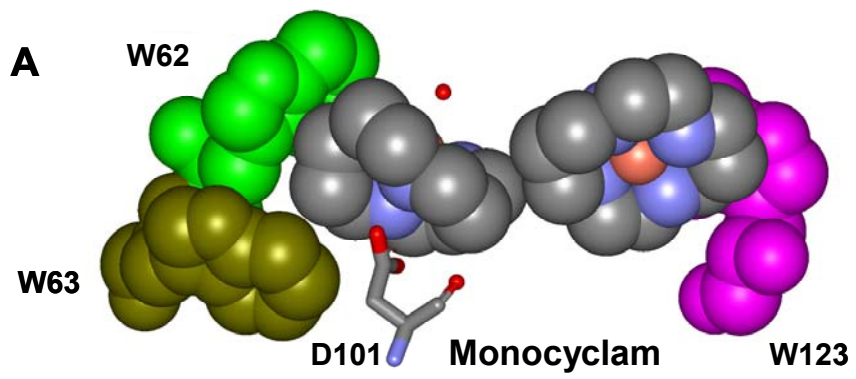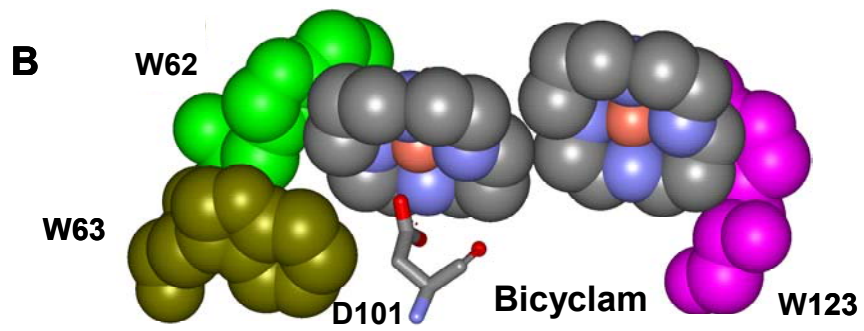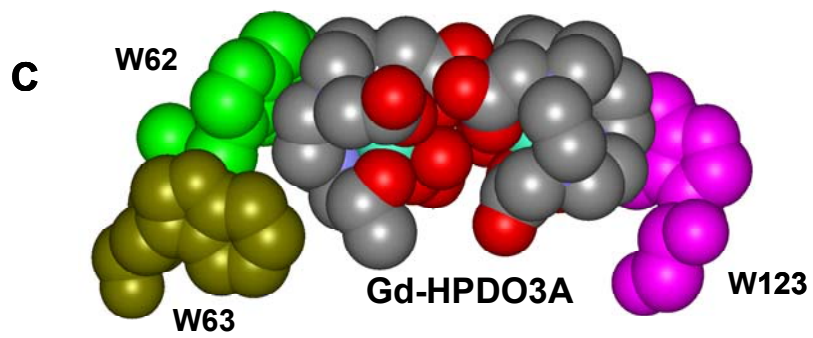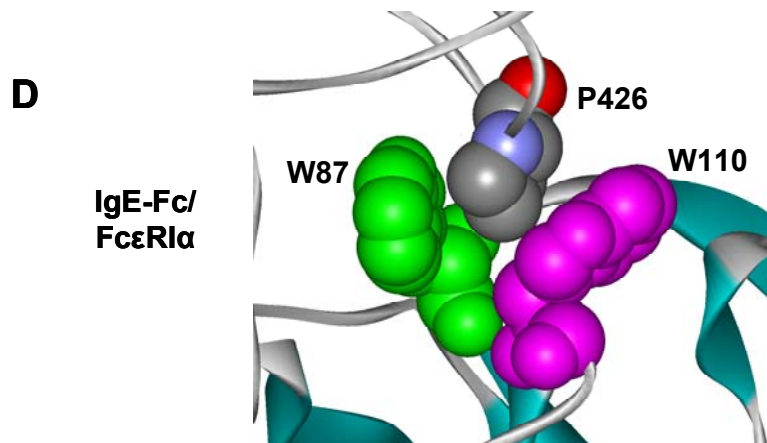

Supplement: pnas_102_7_2288__8.pdf [file pnas_102_7_2288__8.pdf]
